# Supplementary material for: A simple and new fluorescent and colorimetric probe based on NBD–maleimide for detecting thiols in living cells
Source: Royal Society of Chemistry journal article supplement (doi:10.1039/c5ay00732a), 2015-01-01
Supplement: c5ay00732a1.pdf [file c5ay00732a1.pdf]

## Supporting Information

### **A Simple and New Fluorescent and Colorimetric Probe Based on NBD-Maleimide for Detecting Thiols in Living Cells**

Youming Shen,<sup>ab</sup> Chang Liu,<sup>b</sup> Youyu Zhang,<sup>\*b</sup> Xiangyang Zhang,<sup>\*a</sup> Chunxiang Zhang,<sup>a</sup>

Junling Jin,<sup>a</sup> Xuewen Liu,<sup>a</sup> Haitao Li,<sup>b</sup> Shouzhuo Yao<sup>b</sup>

<sup>a</sup> College of Chemistry and Chemical Engineering, Hunan University of Arts and Science, ChangDe, 415000, PR China E-mail: zhangxiangy06@163.com

<sup>b</sup> Key Laboratory of Chemical Biology and Traditional Chinese Medicine Research (Ministry of Education), College of Chemistry and Chemical Engineering, Hunan Normal University, Changsha 410081, PR China E-mail: zhangyy@hunnu.edu.cn

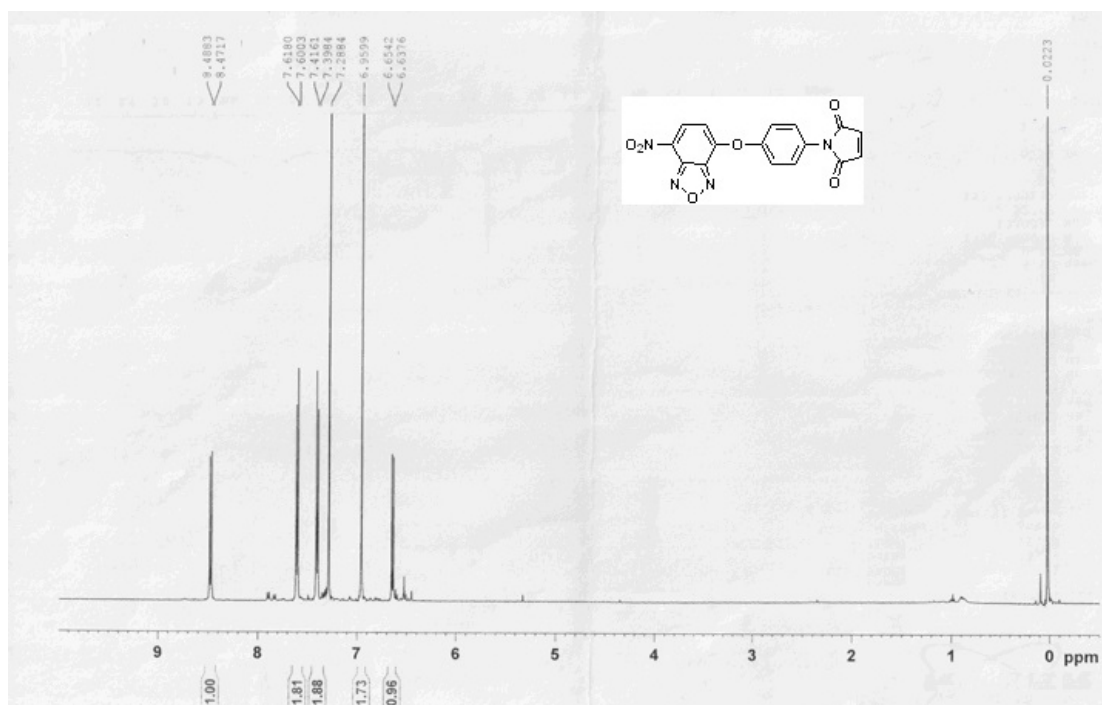

S1

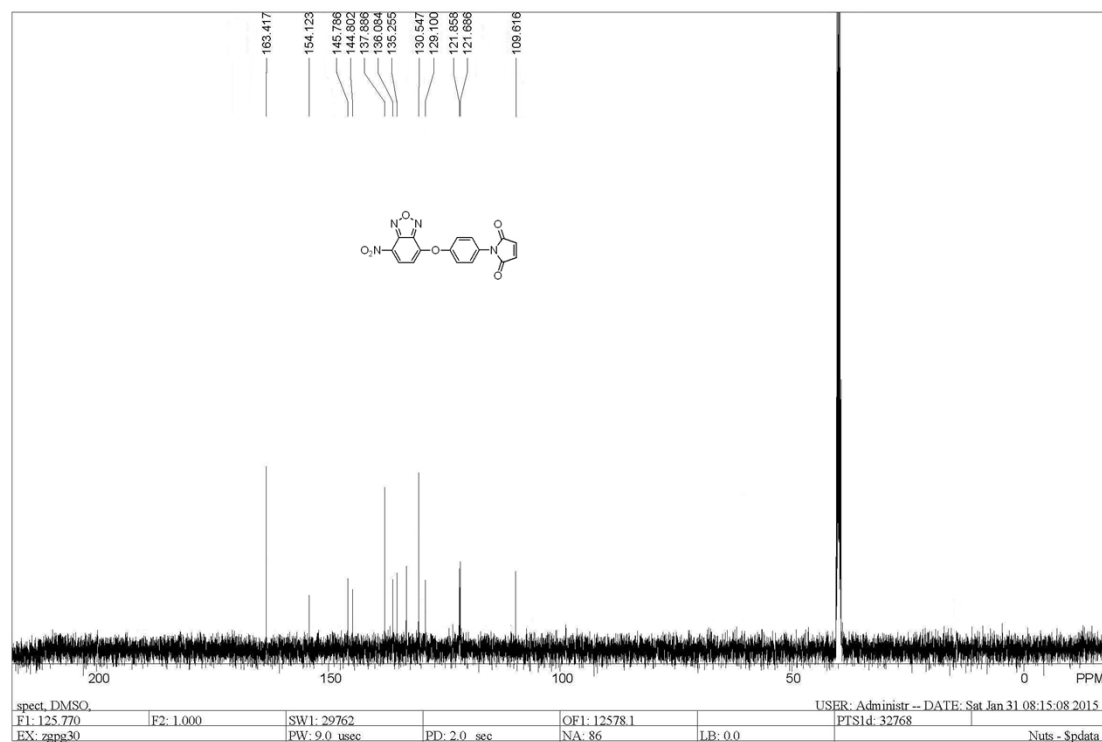

S2

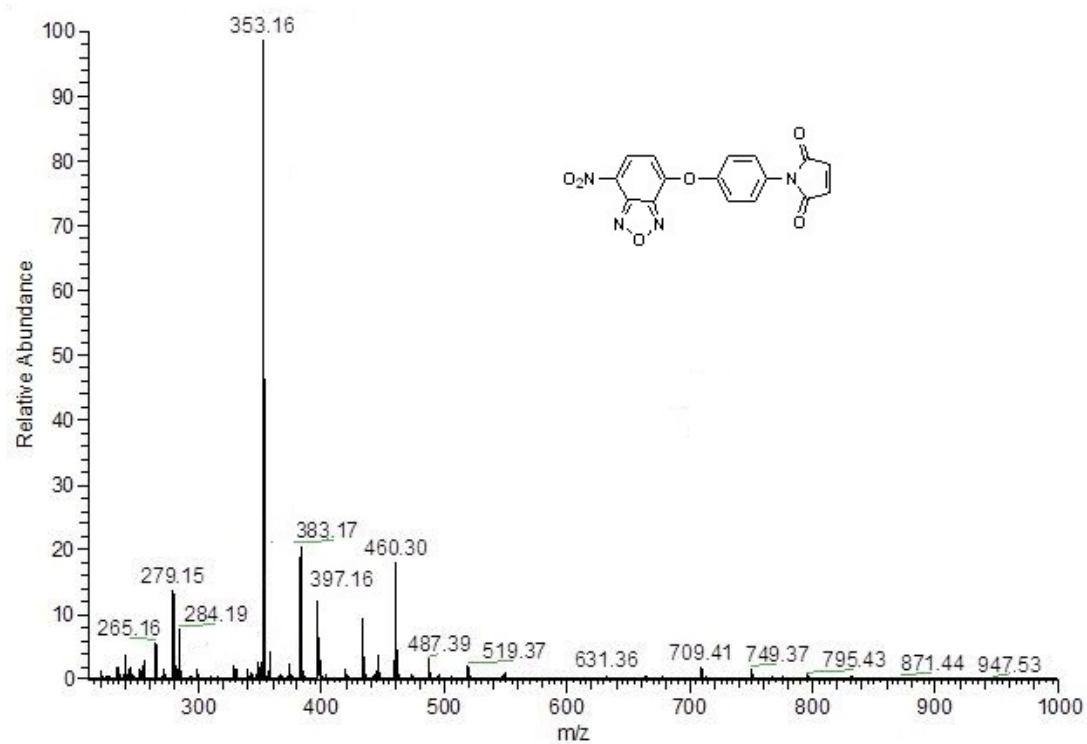

S3

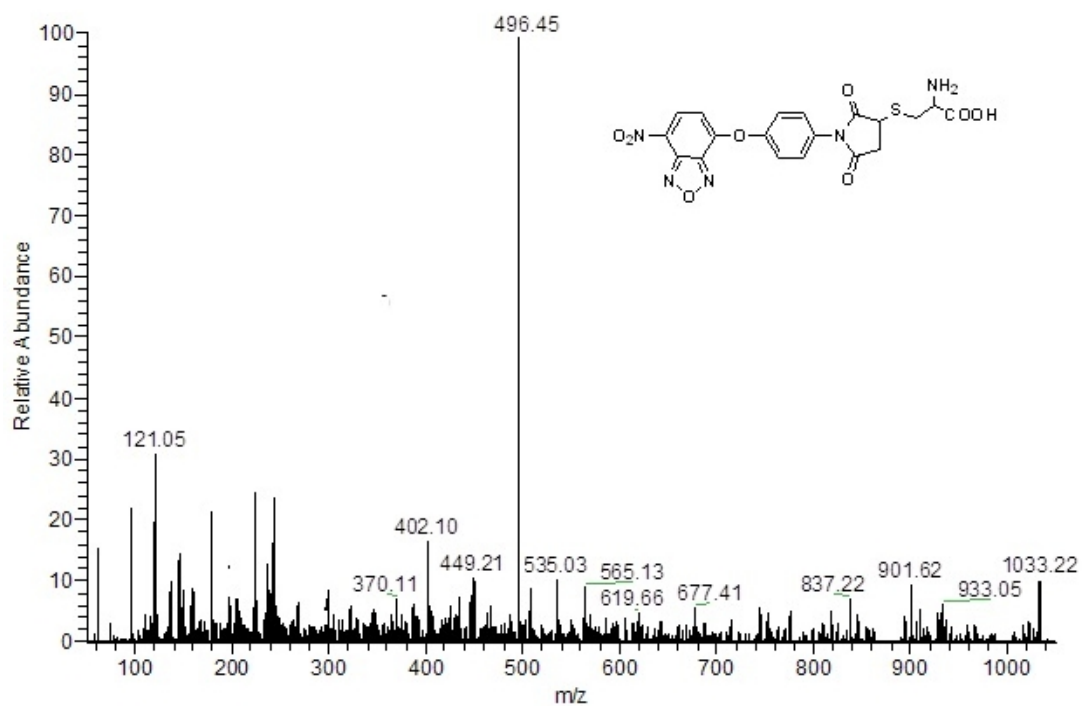

S4
